# Supplementary material for: A novel thermally stable hydroperoxo–copper(ii) complex in a Cu(N2O2) chromophore of a potential N4O2 donor Schiff base ligand: synthesis, structure and catalytic studies
Source: Royal Society of Chemistry journal article supplement (doi:10.1039/c3dt51359a), 2013-01-01
Supplement: c3dt51359a.pdf [file c3dt51359a.pdf]

## A novel thermally stable hydroperoxo-copper (II) complex in Cu (N<sub>2</sub>O<sub>2</sub>) chromophore of a potential N<sub>4</sub>O<sub>2</sub> donor Schiff base ligand: synthesis, structure and catalytic studies.

Surajit Biswas<sup>a</sup>, Arpan Dutta<sup>a</sup>, Mainak Debnath<sup>a</sup>, Malay Dolai<sup>a</sup>, Kalyan K Das<sup>a</sup> and Mohammad Ali<sup>a\*</sup>

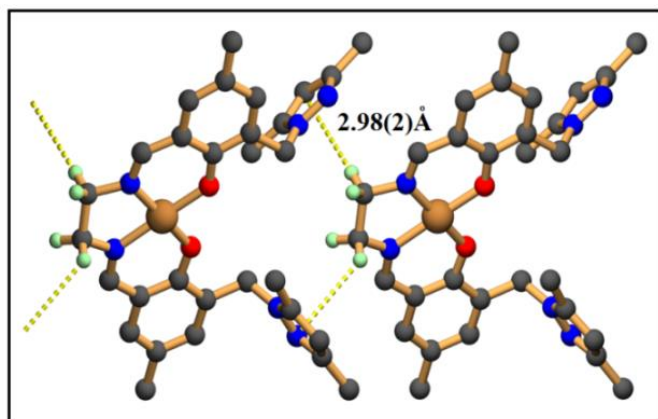

Fig. S1: CH-π interaction in Cu complex 1.

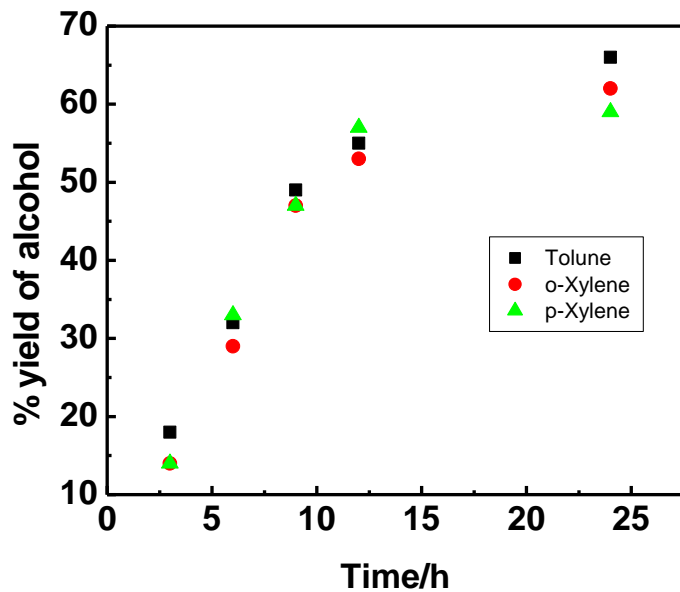

Fig. S2: plot of the % yield of alcohol with reaction time

Table S1 XYZ coordinates of complex 1

| At.No. | X         | Y         | Z         |
|--------|-----------|-----------|-----------|
| 29     | 0.000073  | -2.240976 | 0.000196  |
| 8      | -1.407210 | -0.913194 | 0.013594  |
| 7      | -1.302727 | -3.722791 | -0.233801 |
| 7      | -3.726428 | 2.539059  | 0.057352  |
| 7      | -4.344401 | 3.056018  | 1.153406  |
| 6      | -2.596930 | -3.606597 | -0.242296 |
| 1      | -3.193293 | -4.522106 | -0.349772 |
| 6      | -3.334383 | -2.387362 | -0.129274 |
| 6      | -2.694002 | -1.106051 | -0.015302 |
| 6      | -3.542649 | 0.047525  | 0.072100  |
| 6      | -4.916608 | -0.092747 | 0.058642  |
| 1      | -5.529521 | 0.802169  | 0.141710  |
| 6      | -5.560425 | -1.354152 | -0.048159 |
| 6      | -4.755748 | -2.470687 | -0.141043 |
| 1      | -5.210481 | -3.457231 | -0.226386 |
| 6      | -7.069344 | -1.441937 | -0.054224 |
| 1      | -7.500130 | -1.019913 | 0.863232  |
| 1      | -7.502920 | -0.887016 | -0.896739 |
| 1      | -7.406455 | -2.481553 | -0.132195 |
| 6      | -2.847418 | 1.391106  | 0.204121  |
| 1      | -2.043559 | 1.462753  | -0.534472 |
| 1      | -2.372116 | 1.476434  | 1.186532  |
| 6      | -4.098223 | 3.172145  | -1.094675 |
| 6      | -4.996670 | 4.158067  | -0.714695 |
| 1      | -5.488114 | 4.867939  | -1.367336 |

|   |           |           |           |
|---|-----------|-----------|-----------|
| 6 | -5.114047 | 4.045379  | 0.693818  |
| 6 | -3.563141 | 2.800661  | -2.443323 |
| 1 | -4.030147 | 3.425675  | -3.210093 |
| 1 | -3.767385 | 1.751645  | -2.691681 |
| 1 | -2.477156 | 2.948801  | -2.508663 |
| 6 | -5.940912 | 4.868771  | 1.636749  |
| 1 | -5.634582 | 5.922718  | 1.624346  |
| 1 | -7.005634 | 4.835196  | 1.372799  |
| 1 | -5.827307 | 4.492094  | 2.657826  |
| 6 | -0.644861 | -5.015195 | -0.415611 |
| 1 | -0.388895 | -5.134908 | -1.478000 |
| 1 | -1.298757 | -5.849526 | -0.125849 |
| 8 | 1.407313  | -0.913154 | -0.013866 |
| 7 | 1.302972  | -3.722605 | 0.234841  |
| 7 | 3.726288  | 2.539152  | -0.057667 |
| 7 | 4.344462  | 3.057164  | -1.153116 |
| 6 | 2.597175  | -3.606399 | 0.242773  |
| 1 | 3.193586  | -4.521856 | 0.350435  |
| 6 | 3.334573  | -2.387200 | 0.128966  |
| 6 | 2.694122  | -1.105941 | 0.014697  |
| 6 | 3.542717  | 0.047618  | -0.073331 |
| 6 | 4.916692  | -0.092632 | -0.060295 |
| 1 | 5.529551  | 0.802279  | -0.143834 |
| 6 | 5.560567  | -1.353981 | 0.046705  |
| 6 | 4.755936  | -2.470499 | 0.140274  |
| 1 | 5.210717  | -3.457001 | 0.225840  |
| 6 | 7.069490  | -1.441747 | 0.052307  |
| 1 | 7.499983  | -1.019878 | -0.865357 |
| 1 | 7.503328  | -0.886675 | 0.894589  |

|   |          |           |           |
|---|----------|-----------|-----------|
| 1 | 7.406637 | -2.481345 | 0.130354  |
| 6 | 2.847497 | 1.391181  | -0.205641 |
| 1 | 2.042866 | 1.462502  | 0.532139  |
| 1 | 2.373238 | 1.476836  | -1.188530 |
| 6 | 4.097732 | 3.171244  | 1.095011  |
| 6 | 4.996119 | 4.157640  | 0.716130  |
| 1 | 5.487289 | 4.867006  | 1.369529  |
| 6 | 5.113875 | 4.046209  | -0.692449 |
| 6 | 3.562358 | 2.798466  | 2.443186  |
| 1 | 4.029200 | 3.422731  | 3.210665  |
| 1 | 3.766530 | 1.749204  | 2.690552  |
| 1 | 2.476357 | 2.946541  | 2.508422  |
| 6 | 5.940880 | 4.870540  | -1.634435 |
| 1 | 5.634470 | 5.924452  | -1.621108 |
| 1 | 7.005548 | 4.836790  | -1.370290 |
| 1 | 5.827522 | 4.494814  | -2.655890 |
| 6 | 0.645166 | -5.014929 | 0.417386  |
| 1 | 0.389201 | -5.134029 | 1.479843  |
| 1 | 1.299098 | -5.849402 | 0.128113  |

$S^2 = 0.7531$  (doublet ground state)

Table S2 XYZ coordinates of complex 2

| At. No. | X         | Y         | Z         |
|---------|-----------|-----------|-----------|
| 29      | 0.051099  | -1.894372 | 0.587664  |
| 8       | -1.548107 | -0.636456 | 0.659573  |
| 7       | -1.361672 | -3.321254 | -0.498073 |
| 7       | -3.245820 | 2.738453  | -0.026528 |
| 7       | -4.102950 | 3.764792  | 0.219670  |

|   |           |           |           |
|---|-----------|-----------|-----------|
| 6 | -2.636921 | -3.238938 | -0.409505 |
| 1 | -3.256936 | -4.143414 | -0.552171 |
| 6 | -3.387403 | -2.017954 | -0.153595 |
| 6 | -2.794668 | -0.791974 | 0.330942  |
| 6 | -3.692081 | 0.326819  | 0.478377  |
| 6 | -5.047497 | 0.209576  | 0.200737  |
| 1 | -5.677051 | 1.091630  | 0.324712  |
| 6 | -5.631766 | -0.996231 | -0.233346 |
| 6 | -4.777734 | -2.080790 | -0.392148 |
| 1 | -5.190076 | -3.033620 | -0.728092 |
| 6 | -7.116829 | -1.094366 | -0.504462 |
| 1 | -7.713356 | -0.892775 | 0.396913  |
| 1 | -7.442189 | -0.375174 | -1.269455 |
| 1 | -7.387654 | -2.096514 | -0.858760 |
| 6 | -3.124148 | 1.650260  | 0.952014  |
| 1 | -2.069954 | 1.512072  | 1.202054  |
| 1 | -3.648282 | 2.017593  | 1.838293  |
| 6 | -2.597073 | 2.877945  | -1.217039 |
| 6 | -3.059271 | 4.069612  | -1.765106 |
| 1 | -2.753082 | 4.503925  | -2.708584 |
| 6 | -3.993460 | 4.580276  | -0.834072 |
| 6 | -1.625500 | 1.871736  | -1.752401 |
| 1 | -1.000940 | 2.334373  | -2.523526 |
| 1 | -2.144986 | 1.017285  | -2.204862 |
| 1 | -0.972915 | 1.458192  | -0.976722 |
| 6 | -4.800357 | 5.844298  | -0.901987 |
| 1 | -4.157482 | 6.733316  | -0.954974 |
| 1 | -5.453817 | 5.861656  | -1.784712 |
| 1 | -5.429173 | 5.931017  | -0.009813 |

|   |           |           |           |
|---|-----------|-----------|-----------|
| 6 | -0.706404 | -4.590723 | -0.736900 |
| 1 | -0.378965 | -4.620402 | -1.787899 |
| 1 | -1.369742 | -5.456392 | -0.561125 |
| 8 | 1.401530  | -0.622286 | -0.315058 |
| 7 | 1.280822  | -3.443274 | 0.078459  |
| 7 | 3.448713  | 2.483614  | 0.104123  |
| 7 | 4.614818  | 3.158335  | -0.079365 |
| 6 | 2.469850  | -3.381874 | -0.412487 |
| 1 | 2.979252  | -4.326605 | -0.665155 |
| 6 | 3.218005  | -2.179581 | -0.694488 |
| 6 | 2.626898  | -0.860160 | -0.642223 |
| 6 | 3.494545  | 0.235998  | -1.008359 |
| 6 | 4.811061  | 0.013795  | -1.378633 |
| 1 | 5.425617  | 0.878038  | -1.630018 |
| 6 | 5.387347  | -1.276160 | -1.427755 |
| 6 | 4.567107  | -2.340989 | -1.091065 |
| 1 | 4.969113  | -3.354972 | -1.125560 |
| 6 | 6.832412  | -1.466755 | -1.831621 |
| 1 | 7.036861  | -1.057096 | -2.831096 |
| 1 | 7.520496  | -0.966203 | -1.135548 |
| 1 | 7.100155  | -2.530299 | -1.850411 |
| 6 | 2.933483  | 1.645253  | -0.984892 |
| 1 | 1.847931  | 1.594753  | -0.889690 |
| 1 | 3.183481  | 2.177876  | -1.907114 |
| 6 | 2.958067  | 2.627270  | 1.368610  |
| 6 | 3.858423  | 3.451473  | 2.033548  |
| 1 | 3.782658  | 3.788045  | 3.059778  |
| 6 | 4.868342  | 3.753563  | 1.089671  |
| 6 | 1.673547  | 2.012627  | 1.834120  |

|   |           |           |           |
|---|-----------|-----------|-----------|
| 1 | 1.625843  | 2.041012  | 2.927147  |
| 1 | 1.564320  | 0.974496  | 1.506432  |
| 1 | 0.804382  | 2.564184  | 1.449885  |
| 6 | 6.088263  | 4.612088  | 1.256276  |
| 1 | 5.824288  | 5.651846  | 1.492727  |
| 1 | 6.731284  | 4.246719  | 2.068149  |
| 1 | 6.672540  | 4.610892  | 0.330205  |
| 6 | 0.550427  | -4.695915 | 0.163484  |
| 1 | 0.237362  | -4.828647 | 1.204677  |
| 1 | 1.168394  | -5.553887 | -0.151677 |
| 8 | -0.157821 | -2.589994 | 2.414575  |
| 8 | -1.525330 | -2.581035 | 2.866184  |
| 1 | -1.788786 | -1.663709 | 2.659386  |

$S^2 = 0.7548$  (doublet ground state)
